1 **Maternal arterial blood values during delivery: effect of mode of delivery, maternal**  
2 **characteristics, obstetric interventions and correlation to fetal umbilical cord blood**

3

4 Mehreen Zaigham<sup>1\*</sup>¶, Sara Helfer<sup>1</sup>¶, Karl Heby Kristensen<sup>1</sup>¶, Per-Erik Isberg<sup>2</sup>¶, Nana Wiberg<sup>1,3</sup>¶

5

6 <sup>1</sup> Department of Obstetrics and Gynecology, Institution of Clinical Sciences Malmö, Lund  
7 University, Sweden

8 <sup>2</sup> Department of Statistics, Lund University, Sweden

9 <sup>3</sup> Department of Gynecology and Obstetrics, Skåne University Hospital, Ystad, Sweden

10

11 \*Corresponding Author

12 Email: [mehreen.zaigham@med.lu.se](mailto:mehreen.zaigham@med.lu.se) (MZ)

13

14 ¶ These authors contributed equally to this work.

15

16 **Short title:** Maternal arterial blood gases during delivery

17

18

19

20

21

22

23

24

25

## 26 **Abstract**

### 27 **Objective**

28 To determine a reference interval for maternal arterial blood values during vaginal delivery and  
29 to elucidate the effect of common maternal characteristics and obstetric interventions on  
30 maternal acid base values during vaginal and planned cesarean section (CS).

### 31 **Design**

32 Prospective, observational study of randomly selected women undergoing vaginal deliveries  
33 and planned CS at Skåne University Hospital, Malmö, Sweden.

### 34 **Results**

35 Two hundred and fifty women undergoing vaginal delivery (VD) and fifty-eight women  
36 undergoing planned CS were recruited. We found significant differences for gestational age,  
37 parity, artery pH, pCO<sub>2</sub>, pO<sub>2</sub>, sO<sub>2</sub> and cord venous pH, pCO<sub>2</sub> and lactate between the two study  
38 groups ( $P < 0.005$ ). For women undergoing vaginal delivery, we found significant changes in  
39 base deficit, hemoglobin, bilirubin, potassium, glucose and lactate values as compared to  
40 women with planned CS ( $P < 0.02$ ). Maternal characteristics did not significantly affect acid  
41 base parameters however, multiple regression showed significant associations for the use of  
42 epidural anesthesia on maternal pH ( $P < 0.05$ ) and pO<sub>2</sub> ( $P < 0.01$ ); and synthetic oxytocin on  
43 pCO<sub>2</sub> ( $P = 0.08$ ), glucose ( $P < 0.00$ ) and lactate ( $P < 0.02$ ) in maternal blood. Maternal arterial  
44 pH, pCO<sub>2</sub> and lactate correlated significantly to values in venous umbilical cord blood ( $P <$   
45  $0.000$ ).

### 46 **Conclusions**

47 Reference values for maternal arterial blood gases in vaginal deliveries for term pregnancies  
48 were outlined and we found that most arterial blood gas parameters varied significantly

- 49 according to mode of delivery. The use of different obstetrical interventions like epidural  
50 anesthesia or synthetic oxytocin, resulted in significant changes in blood gas values.

## 51 **Introduction**

52 It is well known that there are significant changes in almost all maternal organ systems during  
53 pregnancy and that these physiological changes enable the mother to optimally nourish the fetus  
54 as well as prepare her for labor (1). Klajnbard and Maguire (2, 3) showed large variations in  
55 most maternal venous parameters during the three trimesters of pregnancy. Despite this  
56 knowledge, obstetricians routinely use reference values from non-pregnant women to assess  
57 the condition of the pregnant patient. Few studies have focused on physiological variations  
58 during pregnancy and delivery, and arterial blood gases including electrolytes, bilirubin,  
59 glucose and lactate have seldom been studied. In addition, the possible impact of mode of  
60 delivery on different maternal and obstetric factors commonly encountered during delivery, has  
61 not been studied.

62 One of the most frequently encountered maternal risk factors during pregnancy and delivery is  
63 obesity. Maternal obesity is associated with increased fat deposition, lower body muscle mass,  
64 decreased respiratory capacity and chronic inflammatory changes with an increased risk for  
65 prolonged labor and adverse maternal-neonatal outcome (4). Smoking during pregnancy is  
66 another potentially detrimental risk factor which can affect maternal acid base balance via  
67 vasoconstrictive effects on blood vessels and it is well recognized that maternal smoking is  
68 associated with hypertension and decreased lung capacity (5, 6).

69 Among obstetric factors, synthetic oxytocin used to augment labor, has powerful effects on  
70 uterine contractions and maternal physiology (7). Similarly, the use of spinal/epidural  
71 anesthesia (EDA) to provide intrapartum analgesia can result in decreased peripheral vascular  
72 resistance which in turn causes alterations to uteroplacental blood flow with impaired  
73 oxygenation (8). EDA is well known to prolong labor and increase the risk for adverse maternal  
74 outcome and obstetric intervention (7, 9).

75 Thus, the main aim of this study was to determine reference values for maternal arterial blood  
76 values during vaginal delivery. We also wanted to elucidate the effect of common maternal  
77 characteristics and obstetric interventions on maternal acid base values during vaginal and  
78 planned CS. Correlations between maternal acid base values and cord venous blood were also  
79 explored.  
80

## 81 **Materials and Methods**

### 82 **Study population**

83 The study was carried out at the Department of Obstetrics and Gynecology, Skåne University  
84 Hospital, Sweden. Our study population consisted of two subgroups: patients intended for  
85 vaginal delivery (VD) from whom the reference interval was calculated (February 2010 to  
86 September 2011) and patients undergoing planned caesarean section (CS) (October 2006 to  
87 January 2007 and December 2009 to July 2011). It was established from a previously published  
88 paper that the demographic and obstetrical data of the VD subgroup were comparable to the  
89 background population i.e. non-participating women who gave birth at the hospital during the  
90 same time period as the study (10).

91 Swedish speaking women in active labor with a cervix dilation of 5-6 centimeters (cm) intended  
92 for vaginal delivery alternatively, women intended for planned CS, were randomly informed  
93 about the study and participating women were required to give written consent before  
94 enrollment in the study. All participants had singleton pregnancies dated by an early second  
95 trimester ultrasound, cephalic presentation and non-pathological cardiotocography (CTG) at  
96 inclusion.

97 Immediately after delivery of the baby, before the first cry, a blood gas sample was obtained  
98 from the mother's right radial artery by N.W. Simultaneously, a midwife/junior nurse collected  
99 blood from the umbilical cord artery and vein using 2 mL pre-heparinized syringes as per  
100 routine at the department. In the planned CS subgroup, a maternal arterial blood gas sample  
101 was collected by the anesthesiologist on call at the exact time point when the fetus was delivered  
102 with simultaneous sampling from the umbilical cord by N.W. All blood samples were analyzed  
103 within 10 minutes after delivery to ensure optimal analysis quality.

104 For both groups, neonatal and obstetric data of significance were entered in to the study's  
105 database directly after the delivery of the infant whilst the mother was still admitted to the  
106 department.

## 107 **Biochemical analyses**

108 Maternal and fetal umbilical cord blood were analyzed using the blood gas analyzer, ABL 800  
109 Flex, Radiometer, Copenhagen, Denmark. In Lund, the blood gas analyzer programmed to  
110 automatically calculate base deficit in extracellular fluid ( $BD_{ecf}$ ) whilst in Malmö, the ABL was  
111 set to calculate base deficit (BD) in whole blood. Since the latter is known to introduce a serious  
112 confounding factor (11, 12), we standardized BD values to  $BD_{ecf}$  post hoc using the algorithms  
113 in the ABL 800 manual:

114

$$115 \quad \log cHCO_3^- = pH + \log (pCO_2 \times 0.2325) - 6.095$$

$$116 \quad cBase (BD) = 0.5 \times \left( \frac{8a' - 0.910}{a'} \right) + 0.5 \times \sqrt{\left( \frac{0.919 - 8a'}{a'} \right)^2 - 4 \times \frac{24.47 - cHCO_3^- - 3(5.33)}{a'}}$$

$$117 \quad a' = 4.04 \times 10^{-3} + 4.25 \times 10^{-4} cHb$$

$$118 \quad cHCO_3^-(5.33) = 0.23 \times 5.33 \times 10^{\left[ \frac{pH(st) - 6.161}{0.9524} \right]}$$

$$119 \quad pH (st) = pH + \log \left( \frac{5.33}{pCO_2} \right) \times \left\{ \frac{pH(Hb) - pH}{\log pCO_2 (Hb) - \log(7.5006 pCO_2)} \right\}$$

$$120 \quad pH (Hb) = 4.06 \times 10^{-2} ctHb + 5.98 - 1.92 \times 10^{(-0.16169ctHb)}$$

$$121 \quad \log pCO_2 (Hb) = -1.7674 \times 10^{-2} ctHb + 3.4046 + 2.12 \times 10^{(-0.15158ctHb)}$$

122

123 where “c” denotes concentration and “ctHb” denotes total concentration of hemoglobin

124 (deoxy-, oxy-, carboxy-, and methemoglobin)

125

126

## 127 **Statistical analyses**

128 Fisher's exact test was used for comparison of categorical variables. Group comparison of  
129 continuous variables was performed using the Kruskal-Wallis test or the Mann-Whitney *U* test,  
130 when appropriate. Values were reported as mean with standard deviation (SD) and median with  
131 interquartile range (IQR). Association between variables was reported using regression  
132 analysis. Correlation between variables was calculated by Spearman's test. A two-sided *P*-value  
133  $< 0.05$  was considered significant. Analyses were performed using IBM SPSS Statistics for  
134 Windows, version 25.0 (SPSS Inc. Chicago, Illinois, USA).

135

## 136 **Ethical Approval**

137 The study was approved by the Central Ethical Board, Stockholm, Dnr: Ö50-2005.

138

139

140

141

142

143

144

145

146

147

148

149

150



## 151 Results

152 A total of 309 women agreed to participate in the study. In the group with planned VD, one  
 153 case was excluded due to emergency CS performed in general anesthesia, leaving 250 cases for  
 154 final analysis in the VD group and 58 cases in the planned CS group.  
 155 The maternal and fetal characteristics are reported in Table 1.

**Table 1. Maternal and fetal characteristics of the two study groups.**

|                                            | <b>Vaginal delivery</b><br>N = 250             | <b>Planned cesarean section</b><br>N = 58      | <b>P value</b>      |
|--------------------------------------------|------------------------------------------------|------------------------------------------------|---------------------|
|                                            | Mean $\pm$ SD<br>Median (2.5, 97.5 percentile) | Mean $\pm$ SD<br>Median (2.5, 97.5 percentile) |                     |
| <b>Maternal BMI</b>                        | 24.07 $\pm$ 4.39<br>23.2 (18.58, 33.35)        | 24.84 $\pm$ 4.89<br>23.4 (17.64, 39.46)        | 0.359 <sup>†</sup>  |
| <b>Gestational age (days)</b>              | 278 $\pm$ 9.6<br>279 (255, 295)                | 270 $\pm$ 4.5<br>270 (258, 282)                | <0.000 <sup>†</sup> |
| <b>Infant weight (g)</b>                   | 3599 $\pm$ 504<br>3558 (2619, 4685)            | 3587 $\pm$ 554<br>3535 (2578, 5019)            | 0.784 <sup>†</sup>  |
| <b>Infant venous pH</b>                    | 7.33 $\pm$ 0.08<br>7.34 (7.13, 7.45)           | 7.36 $\pm$ 0.04<br>7.37 (7.23, 7.45)           | 0.001 <sup>†</sup>  |
| <b>Infant venous pCO<sub>2</sub> (kPA)</b> | 5.36 $\pm$ 1.2<br>5.21 (3.39, 7.55)            | 5.92 $\pm$ 0.82<br>5.82 (4.45, 7.53)           | 0.000 <sup>†</sup>  |
| <b>Infant venous lactate (mmol/L)</b>      | 4.7 $\pm$ 1.9<br>4.4 (2.1-9.7)                 | 1.7 $\pm$ 0.5<br>1.5 (1.1-3.8)                 | 0.000 <sup>†</sup>  |
|                                            | N (%)                                          | N (%)                                          |                     |
| <b>Primipara</b>                           | 150 (60)                                       | 23 (39.7)                                      | 0.005 <sup>‡</sup>  |
| <b>Smoking</b>                             |                                                |                                                | 0.434 <sup>‡</sup>  |
| None                                       | 200 (80)                                       | 48 (82.8)                                      |                     |
| < 10 cigarettes daily                      | 14 (5.6)                                       | 5 (8.6)                                        |                     |
| > 10 cigarettes daily                      | 2 (0.8)                                        | 1 (1.7)                                        |                     |
| <b>5 min AS <math>\leq</math> 7</b>        | 4 (1.6)                                        | 1 (1.7)                                        | -                   |

BMI: body mass index, AS: Apgar Score

<sup>†</sup>: Mann Whitney U Test

<sup>‡</sup>: Fisher's exact test

156

157

158 Significant differences were seen in the frequency of nulli- versus primipara ( $P < 0.005$ ),  
159 gestational age ( $P < 0.000$ ) and for values in umbilical cord venous blood ( $P < 0.008$ ). Although  
160 the differences in pH and pCO<sub>2</sub> were significant, the most remarkable difference was seen for  
161 lactate ( $P < 0.000$ ).

162 Reference values for common maternal acid base values are reported in Table 2.

163

164 **Table 2. Reference values for maternal arterial blood gases according to mode of delivery.**  
165 **Blood collected from radial artery and analyzed by ABL800™ (Radiometer, Copenhagen,**  
166 **Denmark). Mann Whitney *U* Test used for two group comparison.**

|                                      | <b>Vaginal delivery</b>                                   | <b>Planned cesarean section</b>                           | <b>P value</b> |
|--------------------------------------|-----------------------------------------------------------|-----------------------------------------------------------|----------------|
|                                      | <b>N = 250</b>                                            | <b>N = 59</b>                                             |                |
|                                      | Mean $\pm$ SD<br>Median (2.5, 97.5 percentile)<br>[Range] | Mean $\pm$ SD<br>Median (2.5, 97.5 percentile)<br>[Range] |                |
| <b>pH</b>                            | 7.41 $\pm$ 0.06<br>7.41 (7.32, 7.54)<br>[7.32-7.83]       | 7.44 $\pm$ 0.05<br>7.44 (7.31, 7.57)<br>[7.29-7.57]       | < 0.000        |
| <b>pCO<sub>2</sub> (kPa)</b>         | 3.29 $\pm$ 0.52<br>3.35 (2.18, 4.22)<br>[1.03-4.37]       | 4.16 $\pm$ 0.62<br>4.25 (2.81, 5.95)<br>[2.59-6.45]       | < 0.000        |
| <b>pO<sub>2</sub> (kPa)</b>          | 15.7 $\pm$ 4<br>15.6 (11.5, 21.3)<br>[7.3-64.5]           | 20.7 $\pm$ 7.4<br>19.2 (14.4, 53.7)<br>[14.3-57.5]        | < 0.000        |
| <b>sO<sub>2</sub> (%)</b>            | 98.2 $\pm$ 1.1<br>98.4 (96.2, 99.4)<br>[89.4-99.5]        | 99.1 $\pm$ 0.5<br>99.1 (96.2, 99.4)<br>[97.5-100]         | < 0.000        |
| <b>BD (mmol/L)</b>                   | 7.2 $\pm$ 2.9<br>7 (3 -13.4)<br>[-10.6, 21.6]             | 2.2 $\pm$ 1.4<br>2.1 (-1.1, -5.3)<br>[-1.3, 5.6]          | < 0.000        |
| <b>ctHb (g/L)</b>                    | 136 $\pm$ 10<br>137 (117, 156)<br>[97-190]                | 113 $\pm$ 19<br>110 (81, 182)<br>[78-196]                 | < 0.000        |
| <b>Hctc</b>                          | 0.417 $\pm$ 0.032<br>0.42 (0.36, 0.48)<br>[0.3-0.55]      | 0.35 $\pm$ 0.056<br>0.34 (0.25-0.56)<br>[0.24-0.6]        | < 0.000        |
| <b>FHbF (%)</b>                      | 6.4 $\pm$ 6.3<br>5 (0, 28.4)<br>[0-33]                    | 7.2 $\pm$ 5.3<br>5.5 (0, 18.9)<br>[0-19]                  | 0.175          |
| <b>ctBil (<math>\mu</math>mol/l)</b> | 13 $\pm$ 8<br>12 (0, 35)<br>[0-48]                        | 10 $\pm$ 7<br>9 (0, 34)<br>[0-38]                         | 0.004          |
| <b>Na<sup>+</sup> (mmol/L)</b>       | 135 $\pm$ 2.6<br>135 (130, 140)<br>[126-142]              | 136 $\pm$ 1.1<br>136 (134, 138.6)<br>[134-139]            | 0.073          |
| <b>K<sup>+</sup> (mmol/L)</b>        | 3.9 $\pm$ 0.3<br>3.8 (3.3, 4.5)<br>[3.1-5.1]              | 3.7 $\pm$ 0.2<br>3.7 (3.2, 4.2)<br>[3.2-4.2]              | < 0.000        |
| <b>Glucose (mmol/L)</b>              | 7.2 $\pm$ 1.3<br>7.1 (5.1, 10.4)<br>[4.9-11.2]            | 4.6 $\pm$ 0.6<br>4.5 (3.6, 6.4)<br>[3.6-6.7]              | < 0.000        |
| <b>Lactate (mmol/L)</b>              | 4.9 $\pm$ 1.6<br>4.7 (2.2, 8.7)<br>[1.2-9.6]              | 1.2 $\pm$ 0.3<br>1.1 (0.7, 1.9)<br>[0.7-1.9]              | < 0.000        |

pCO<sub>2</sub>: partial pressure of carbon dioxide, pO<sub>2</sub>: partial pressure of carbon dioxide, sO<sub>2</sub>: oxygen saturation, BE: base deficit, ctHb: total concentration of hemoglobin, ctBil: total concentration of bilirubin, Hctc: hematocrit

168 The table also illustrates the differences in maternal arterial blood gas parameters according to  
169 mode of delivery. Not surprisingly, significant differences were observed in most biochemical  
170 parameters between the groups. A significantly lower pH, pCO<sub>2</sub>, pO<sub>2</sub>, and sO<sub>2</sub> were found in  
171 mothers giving birth vaginally as compared to planned CS. On the other hand, BD, total  
172 hemoglobin concentration (ctHb), hematocrit (Hctc), total concentration of bilirubin (ctBil),  
173 potassium ion concentration (K<sup>+</sup>), glucose and lactate were significantly higher with VD as  
174 compared to planned CS. Comparison of nulli- and multipara women with VD showed  
175 significant differences in pO<sub>2</sub>, sodium ion concentration (Na<sup>+</sup>) and glucose levels ( $P < 0.02$ )  
176 (Table not shown).

177 Table 3 illustrates the influence of maternal characteristics and obstetrical interventions on acid-  
178 base parameters.

**Table 3**

Correlation of different maternal arterial acid-base values with respect to body mass index (BMI), smoking during pregnancy, the presence of hypertension/preeclampsia and the use of epidural anesthesia, oxytocin (intravenous) or nitrous oxide during labor.

|                                       |           |       | pH                               | P value | pCO <sub>2</sub>                 | P value | pO <sub>2</sub>                      | P value | ctHb (g/L)                 | P value | Glucose                       | P value | Lactate                     | P value |
|---------------------------------------|-----------|-------|----------------------------------|---------|----------------------------------|---------|--------------------------------------|---------|----------------------------|---------|-------------------------------|---------|-----------------------------|---------|
| <b>BMI</b>                            | <18.5     | N=9   | 7.43 (0.05)<br>7.42 (7.36, -)    | 0.41    | 3.31 (0.48)<br>3.53 (2.38, -)    | 0.303   | 16.06 (8.85)<br>16.00 (15.10, -)     | 0.145   | 141 (9)<br>141 (123, -)    | 0.119   | 7.1 (2)<br>6.3 (5.5, -)       | 0.47    | 4.4 (2)<br>3.4 (2.5, -)     | 0.221   |
|                                       | 18.5-24.9 | N=128 | 7.42 (0.06)<br>7.41 (7.33, 7.54) |         | 3.29 (0.48)<br>3.36 (2.23, 4.21) |         | 15.63 (2.43)<br>15.6 (11.31, 21.97)  |         | 135 (11)<br>137 (115, 156) |         | 7.2 (1.3)<br>7.1 (5, 10.4)    |         | 5.0 (1.6)<br>4.8 (2.3, 8.9) |         |
|                                       | 25-29.9   | N=41  | 7.41 (0.06)<br>7.40 (7.32, 7.51) |         | 3.18 (0.61)<br>3.32 (1.08, 3.93) |         | 15.33 (1.99)<br>15.7 (10.36, 20.86)  |         | 135 (9)<br>135 (118, 154)  |         | 7.4 (1.3)<br>7.3 (5.1, 10.5)  |         | 5.0 (1.9)<br>4.7 (1.2, 9.5) |         |
|                                       | >30       | N=19  | 7.40 (0.04)<br>7.38 (7.34, 7.39) |         | 3.53 (0.48)<br>3.38 (2.79, -)    |         | 14.71 (1.38)<br>14.8 (12.30, -)      |         | 131 (11)<br>131 (108, -)   |         | 7.0 (0.9)<br>7.0 (6.0, -)     |         | 4.3 (0.9)<br>4.1 (3.2, -)   |         |
| <b>Smoking</b>                        | No        | N=173 | 7.41 (0.06)<br>7.41 (7.32, 7.54) | 0.398   | 3.3 (0.51)<br>3.37 (2.18, 4.22)  | 0.805   | 15.46 (2.18)<br>15.60 (11.20, 20.48) | 0.949   | 135 (11)<br>135 (115, 156) | 0.926   | 7.26 (1.3)<br>7.1 (5.1, 10.4) | 0.731   | 4.9 (1.6)<br>4.7 (2.1, 8.4) | 0.421   |
|                                       | Yes       | N=14  | 7.4 (0.05)<br>7.39 (7.34, -)     |         | 3.37 (0.56)<br>3.22 (2.64, -)    |         | 16.04 (3.36)<br>15.60 (12.6, -)      |         | 134 (11)<br>138 (118, -)   |         | 7.1 (0.9)<br>6.7 (5.9, -)     |         | 5.4 (2)<br>4.9 (3, -)       |         |
| <b>Hypertension/<br/>Preeclampsia</b> | No        | N=187 | 7.41 (0.06)<br>7.41 (7.32, 7.53) | 0.723   | 3.29 (0.52)<br>3.35 (2.19, 4.22) | 0.420   | 15.53 (2.29)<br>15.60 (11.60, 21.20) | 0.065   | 136 (11)<br>137 (116-155)  | 0.063   | 7.2 (1.3)<br>7.1 (5.1-10.3)   | 0.729   | 5.0 (1.7)<br>4.7 (2.1-8.7)  | 0.998   |
|                                       | Yes       | N=9   | 7.41 (0.04)<br>7.41 (7.33, -)    |         | 3.40 (0.33)<br>3.51 (2.68, -)    |         | 14.17 (1.09)<br>14.7 (10.30, -)      |         | 130 (7)<br>130 (119, -)    |         | 7.2 (1.7)<br>7.1 (5.7, -)     |         | 4.9 (1.2)<br>5.2 (3.4, -)   |         |
| <b>EDA</b>                            | No        | N=159 | 7.41 (0.06)<br>7.40 (7.32, 7.53) | 0.047   | 3.29 (0.51)<br>3.34 (2.18, 4.23) | 0.872   | 15.72 (2.00)<br>15.70 (11.90, 19.55) | 0.01    | 136 (11)<br>137 (118, 155) | 0.407   | 7.2 (1.3)<br>7.1 (5.1, 10.5)  | 0.977   | 5.0 (1.7)<br>4.8 (2.1-8.7)  | 0.363   |
|                                       | Yes       | N=55  | 7.42 (0.05)<br>7.42 (7.32, 7.54) |         | 3.28 (0.55)<br>3.39 (1.99, 4.22) |         | 14.90 (2.52)<br>15.10 (7.85, 21.67)  |         | 135 (11)<br>135 (111, 157) |         | 7.2 (1.3)<br>7.1 (5, 10.4)    |         | 4.7 (1.5)<br>4.5 (2.2, 8.7) |         |
| <b>NO<sub>2</sub></b>                 | No        | N=27  | 7.42 (0.07)<br>7.42 (7.32, -)    | 0.291   | 3.23 (0.54)<br>3.13 (2.27, -)    | 0.377   | 16.53 (3.01)<br>16.00 (11.70, -)     | 0.061   | 133 (13)<br>135 (97, -)    | 0.496   | 7.3 (1.3)<br>6.9 (5.8, -)     | 0.836   | 4.9 (1.6)<br>4.3 (2.6, -)   | 0.967   |
|                                       | Yes       | N=177 | 7.41 (0.06)<br>7.41 (7.32, 7.53) |         | 3.30 (0.51)<br>3.35 (2.18, 4.22) |         | 15.42 (1.95)<br>15.60 (11.79, 19.46) |         | 136 (11)<br>137 (118, 156) |         | 7.2 (1.3)<br>7.1 (5.1, 10.4)  |         | 4.9 (1.7)<br>4.7 (2.1-8.7)  |         |
| <b>Oxytocin</b>                       | No        | N=99  | 7.42 (0.05)<br>7.41 (7.33, 7.53) | 0.239   | 3.39 (0.50)<br>3.43 (2.25, 4.28) | 0.08    | 15.86 (2.17)<br>15.70 (12.03, 22.31) | 0.067   | 136 (12)<br>138 (112, 154) | 0.409   | 6.8 (1.2)<br>6.5 (5.0, 10.0)  | 0.000   | 4.6 (1.5)<br>4.5 (2.1, 8.1) | 0.019   |
|                                       | Yes       | N=115 | 7.41 (0.06)<br>7.41 (7.32, 7.55) |         | 3.20 (0.51)<br>3.28 (2.13, 4.14) |         | 15.20 (2.11)<br>15.40 (10.14, 21.05) |         | 135 (10)<br>136 (116, 158) |         | 7.6 (1.3)<br>7.4 (5.4, 10.6)  |         | 5.2 (1.7)<br>4.9 (2.3, 8.8) |         |

“N” is the number of valid cases per parameter. For two group comparison Mann Whitney *U* test. For multiple group comparison Kruskal-Wallis test.

EDA: epidural anesthesia, NO<sub>2</sub>: nitrous dioxide, pCO<sub>2</sub>: partial pressure of carbon dioxide, pO<sub>2</sub>: partial pressure of carbon dioxide, ctHb: total concentration of hemoglobin

180 For biochemical parameters not shown in Table 3, the use of nitrous oxide gas (N<sub>2</sub>O) was found  
181 to significantly effect potassium (3.8 mmol/L versus 4.0 mmol/L,  $P < 0.000$ ) and bilirubin  
182 levels (12.2  $\mu$ mol/L versus 18.4  $\mu$ mol/L,  $P < 0.012$ ). Similarly, the use of oxytocin had a  
183 significant impact on sodium concentrations (134.6 mmol/L versus 135.9 mmol/L,  $P < 0.000$ )  
184 and oxygen saturation (98.1% versus 98.4%, ( $P < 0.01$ )).

185 Calculated only for women with VD, multiple regression analysis with pH, pCO<sub>2</sub>, pO<sub>2</sub>, glucose  
186 and BD and lactate as dependent variables and the use of EDA, oxytocin and N<sub>2</sub>O respectively  
187 as independent variables, significant associations were found for the use of oxytocin and pCO<sub>2</sub>  
188 ( $P = 0.016$ ), glucose ( $P = 0.000$ ) and lactate ( $P = 0.013$ ) levels in maternal blood. Maternal  
189 arterial pH, pCO<sub>2</sub> and lactate values correlated significantly to values in venous umbilical cord  
190 blood ( $P < 0.000$ ) (Table not shown) with the correlation coefficient (R<sup>2</sup>) values as follows: pH  
191 R<sup>2</sup>=0.22, pCO<sub>2</sub> R<sup>2</sup>=0.07 and lactate R<sup>2</sup>=0.38. Although significant, the total duration of active  
192 “pushing” during the second stage of labor correlated poorly to both maternal and fetal lactate  
193 concentration (R<sup>2</sup>=0.06,  $P < 0.000$ ). In addition, we found no significant correlation between  
194 placental weight and fetal lactate concentration (R<sup>2</sup> = 0.01,  $P = 0.431$ ).

195

196

197

198

199

200

201

202

203

204

## 205 **Discussion**

206 To the best of our knowledge, this is the first study to present reference values in maternal  
207 arterial blood at delivery. Although data collection and analysis were performed some years  
208 ago, the Radiometer ABL800 is still popularly used for blood gas analysis in many parts of the  
209 world making our results relevant today (13).

### 210 **Values in maternal arterial blood**

211 Vaginal delivery is often compared to running an exhausting marathon for the delivering  
212 mother. To highlight the drastic effect on maternal arterial blood gas values during a vaginal  
213 delivery, we choose women undergoing planned CS as a control group. The significant  
214 differences in acid base values according to mode of delivery came as no surprise.

215 With VD, the sheer force of uterine contractions and bearing down results in impaired  
216 oxygenation and anaerobic glycolysis with lactate accumulation in both the mother and fetus  
217 (14, 15). The higher BD values in the VD group strengthened this observation, showing a  
218 tendency towards metabolic acidemia in the VD group. The lower pCO<sub>2</sub> concentration can be  
219 explained by maternal hyperventilation, which is used as a compensatory mechanism for the  
220 metabolic component (respiratory compensated metabolic acidosis) to help keep maternal pH  
221 within a normal range. In addition, low maternal pCO<sub>2</sub> facilitates the elimination of fetal pCO<sub>2</sub>  
222 (Double Bohr effect) (15) thereby protecting the fetus from severe fetal respiratory acidosis.  
223 The lower hemoglobin concentration in the CS group is explained by the practice of giving a  
224 bolus of intravenous fluids when administering local anesthesia whilst higher glucose values in  
225 maternal arterial blood during vaginal deliveries can be attributed to a heightened sympathetic  
226 reaction prompting the body to release more glucose via glycogenolysis (16).

227 We were able to show significant differences in the VD group according to type of obstetric  
228 intervention used. EDA, inhibits neuronal feedback from sensory nerves in the uterus to the  
229 brain, resulting in a reduction in the endocrine pain response and decreasing adrenalin secretion

230 from the adrenal medulla. There is also a reduction in oxytocin release from the pituitary gland  
231 which, together with decreased sympathetic response, results in maternal hypotension, motor  
232 blockade, low blood pressure and respiratory depression (7). Although we were unable to see  
233 any difference in pCO<sub>2</sub> levels, pO<sub>2</sub> levels were found to be significantly lower in women  
234 receiving EDA. We also saw higher pH and prominently lower lactate levels in the EDA  
235 subgroup, which can be explained by less effective muscle- including uterine contractions.  
236 Clinically, the use of EDA increased the likelihood of using synthetic oxytocin in order to  
237 augment uterus contractions and thus maintain normal “progress” during the first and second  
238 stages of labor (9). Stimulation with synthetic oxytocin, however, is not synonymous to normal  
239 physiological labor. Firstly, synthetic oxytocin does not cross the blood-brain barrier and  
240 secondly, during normal labor, oxytocin is released as small narrow peaks. Synthetic oxytocin  
241 is administered as a continuous infusion resulting in uniform levels which are suggested to  
242 influence the uterine muscle work with increased risk for hyperstimulation and lactate  
243 accumulation (17). The active transportation of the lactate ion into the maternal circulation  
244 leads to an increase in the level of lactate as seen from our results.

245 We explored the relationship of various maternal characteristics like BMI, smoking and  
246 hypertension on arterial acid base values and electrolytes. Although no significant changes  
247 could be shown, a larger study cohort than ours may be needed to investigate these  
248 characteristics further.

## 249 **Correlation between maternal and fetal lactate**

250 We did not find a strong correlation between pushing time and maternal pH (not surprisingly  
251 since the value of pH is logarithmic) and lactate. In a smaller material. Nordström et al showed  
252 a sharp increase in both maternal and fetal lactate during the second stage of labor (18). The  
253 vast majority of fetal lactate is produced during this stage, and a prolonged stage of expulsion  
254 is associated with higher lactate concentrations in both umbilical cord- and fetal scalp blood



255 (10, 20). Sub-analysis of our data showed that an increase in maternal lactate was associated  
256 with a corresponding increase in umbilical cord venous lactate values which, in turn, were  
257 positively associated with lactate values sampled from fetal scalp blood. However, the  
258 regression model only accounted for 38% of the venous fetal lactate increase, indicating that  
259 the rest must originate from the fetus itself. Transfer of lactate across the placenta may thus  
260 contribute minimally to the total fetal lactate concentration increase during the second stage of  
261 labor. The placenta is metabolic organ with lactate generation but we were unable to  
262 demonstrate any association between the weight of the placenta and fetal lactate concentration.  
263 Therefore, like previous studies, we concluded that the majority of fetal lactate was produced  
264 through endogenous lactate production within the fetus itself. This finding reinforces the use of  
265 fetal lactate from scalp blood sampling as a reliable tool in the evaluation of fetal distress (19,  
266 20).

267

## 268 **Strengths and limitations**

269 One of the major strengths of the current study was that blood sampling was conducted by  
270 trained professionals in both the groups. A specialist obstetrician (N.W) took fetal scalp lactate  
271 and maternal arterial blood gas samples in the VD group. In addition, all blood gas samples  
272 were analyzed immediately upon procurement, aided by a blood gas analyzer machine located  
273 within the Labor and Delivery department of the Hospital. Relevant obstetric and neonatal data  
274 was also entered directly after delivery into the study's data base.

275

## 276 **Conclusions**

277 Reference values for maternal arterial blood gases in vaginal deliveries for term pregnancies  
278 have been outlined with this study. We found that most arterial blood gas parameters varied  
279 significantly according to mode of delivery. In addition, different obstetrical interventions like  
280 the use of epidural anesthesia or synthetic oxytocin, resulted in significant changes in blood gas  
281 values. It may, therefore, be concluded that laboring women have altered biochemical  
282 parameters and reference values based on non-pregnant women should be interpreted with  
283 caution.

284

## 285 **Acknowledgments**

286 Our sincere thanks to all the participating women in the study.

287

## 288 **References**

- 289 1. Soma-Pillay P, Nelson-Piercy C, Tolppanen H, Mebazaa A. Physiological changes in  
290 pregnancy. *Cardiovasc J Afr.* 2016 Mar 1;27(2):89–94.
- 291 2. Klajnbard A, Szecsi PB, Colov NP, Andersen MR, Jørgensen M, Bjørngaard B, et al.  
292 Laboratory reference intervals during pregnancy, delivery and the early postpartum  
293 period. *Clin Chem Lab Med.* 2010;48(2):237–85.
- 294 3. Maguire PJ, Finlay J, Power KA, Harley R, Mhurchú MN, Sheehan SR, et al.  
295 Evaluation of point-of-care maternal venous lactate testing in normal pregnancy. *J*  
296 *Matern Fetal Neonatal Med.* 2016;29(16):2607–10.
- 297 4. Rodríguez-Mesa N, Robles-Benayas P, Rodríguez-López Y, Pérez-Fernández EM,  
298 Cobo-Cuenca AI. Influence of Body Mass Index on Gestation and Delivery in  
299 Nulliparous Women: A Cohort Study. *Int J Environ Res Public Health.* 2019;16(11).
- 300 5. Jauniaux E, Burton GJ. Morphological and biological effects of maternal exposure to  
301 tobacco smoke on the feto-placental unit. Vol. 83, *Early Human Development.* 2007. p.  
302 699–706.
- 303 6. Rogers JM. Tobacco and pregnancy. *Reprod Toxicol.* 2009 Sep;28(2):152–60.
- 304 7. Uvnäs-Moberg K, Ekström-Bergström A, Berg M, Buckley S, Pajalic Z, Hadjigeorgiou  
305 E, et al. Maternal plasma levels of oxytocin during physiological childbirth - a  
306 systematic review with implications for uterine contractions and central actions of  
307 oxytocin. *BMC Pregnancy Childbirth.* 2019 Aug 9;19(1):285.
- 308 8. Baumann H, Alon E, Atanassoff P, Pasch T, Huch A, Huch R. Effect of epidural  
309 anesthesia for cesarean delivery on maternal femoral arterial and venous,  
310 uteroplacental, and umbilical blood flow velocities and waveforms. *Obstet Gynecol.*  
311 1990 Feb;75(2):194–8.
- 312 9. Anim-Somuah M, Smyth RMD, Cyna AM, Cuthbert A. Epidural versus non-epidural

- 313 or no analgesia for pain management in labour. Vol. 2018, Cochrane Database of  
314 Systematic Reviews. John Wiley and Sons Ltd; 2018.
- 315 10. Wiberg N, Källén K. Fetal scalp blood lactate during second stage of labor:  
316 determination of reference values and impact of obstetrical interventions. *J Matern*  
317 *Neonatal Med.* 2017;30(5).
- 318 11. Wiberg N, Källén K, Olofsson P. Base deficit estimation in umbilical cord blood is  
319 influenced by gestational age, choice of fetal fluid compartment, and algorithm for  
320 calculation. *Am J Obstet Gynecol.* 2006;195(6).
- 321 12. Mokarami P, Wiberg N, Olofsson P. An overlooked aspect on metabolic acidosis at  
322 birth: Blood gas analyzers calculate base deficit differently. *Acta Obstet Gynecol*  
323 *Scand.* 2012;91(5).
- 324 13. Key Facts and Figures - Radiometer [Internet]. [cited 2019 Dec 8]. Available from:  
325 <https://www.radiometer.com/en/about-radiometer/key-facts#>
- 326 14. G. R. Perinatal Acid-Base Balance. Lund. Sweden.: Studentlitteratur; 1988.
- 327 15. Blechner JN. Maternal-fetal acid-base physiology. *Clinic Obstet Gynecol.*  
328 1993;36:3-12.
- 329 16. Jones BJ, Tan T, Bloom S. Minireview: Glucagon in stress and energy homeostasis.  
330 *Endocrinology.* 2012.
- 331 17. Budden A, Chen LJY, Henry A. High-dose versus low-dose oxytocin infusion  
332 regimens for induction of labour at term. Vol. 2016, Cochrane Database of Systematic  
333 Reviews. John Wiley and Sons Ltd; 2014.
- 334 18. Nordström L, Achanna S, Naka K, Arulkumaran S. Fetal and maternal lactate increase  
335 during active second stage of labour. *BJOG.* 2001 Mar;108(3):263–8.
- 336 19. Kruger K, Hallberg B, Blennow M, Kublickas M, Westgren M. Predictive value of  
337 fetal scalp blood lactate concentration and pH as markers of neurologic disability. *Am J*

- 338           Obstet Gynecol. 1999 Nov 1;181(5):1072–8.
- 339    20.    Heinis AMF, Spaanderman ME, Gunnewiek JMTK, Lotgering FK. Scalp blood lactate  
340           for intra-partum assessment of fetal metabolic acidosis. Acta Obstet Gynecol Scand.  
341           2011 Oct;90(10):1107–14.
- 342
